# Supplementary material for: Epigenetic activation of VEGFA by SMARCD1 mediates tumor progression and bevacizumab resistance in clear cell renal cell carcinoma
Source: Research Square preprint supplement (doi:10.21203/rs.3.rs-8031896/v1), 2025-11-20

Figure 1A

SMARCD1 —

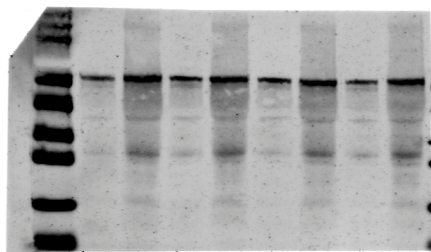

SMARCD1 —

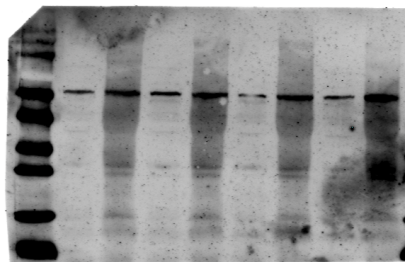

$\beta$ -actin —

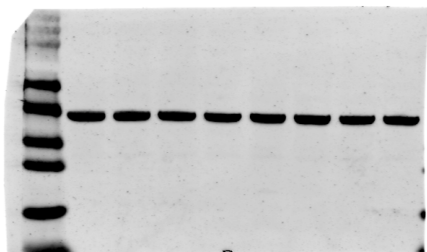

$\beta$ -actin —

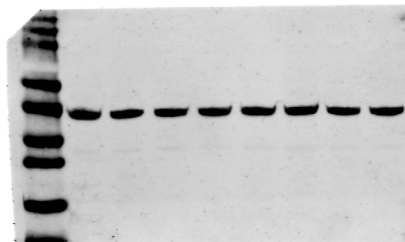

Figure 2B

SMARCD1 —

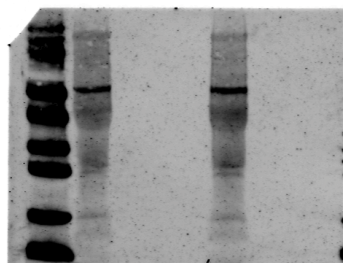

$\beta$ -actin —

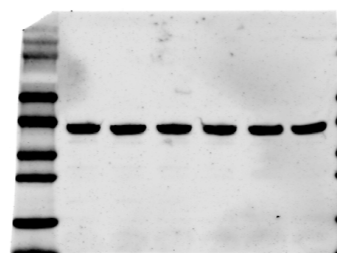

Figure 2D

SMARCD1 —

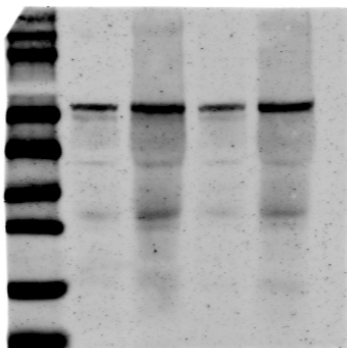

$\beta$ -actin —

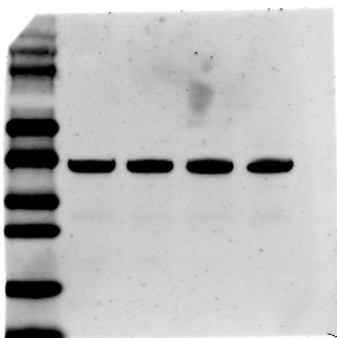

Figure 3E

SMARCD1 —

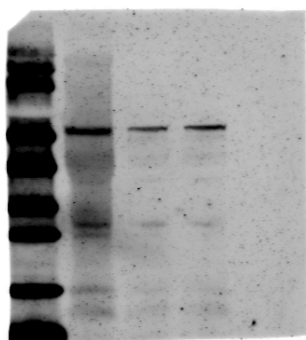

VEGFA —

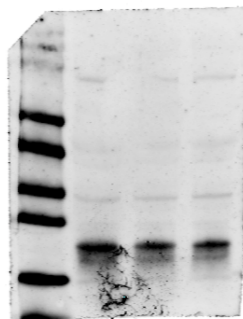

GAPDH —

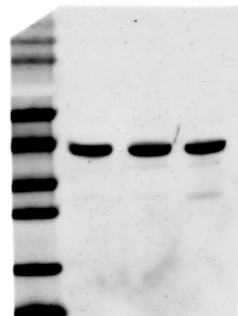

Supplement: Supplementary file 1 [file bf7e31ec85a508730f87afca.pdf]
